# Supplementary material for: A cross-sectional study on stool- and gastrointestinal-related outcomes of Mexican infants consuming different formulae
Source: Springer Nature journal article supplement (doi:10.1186/s12887-023-04426-y), 2023-12-15

Additional Figure 1 - Flow Chart

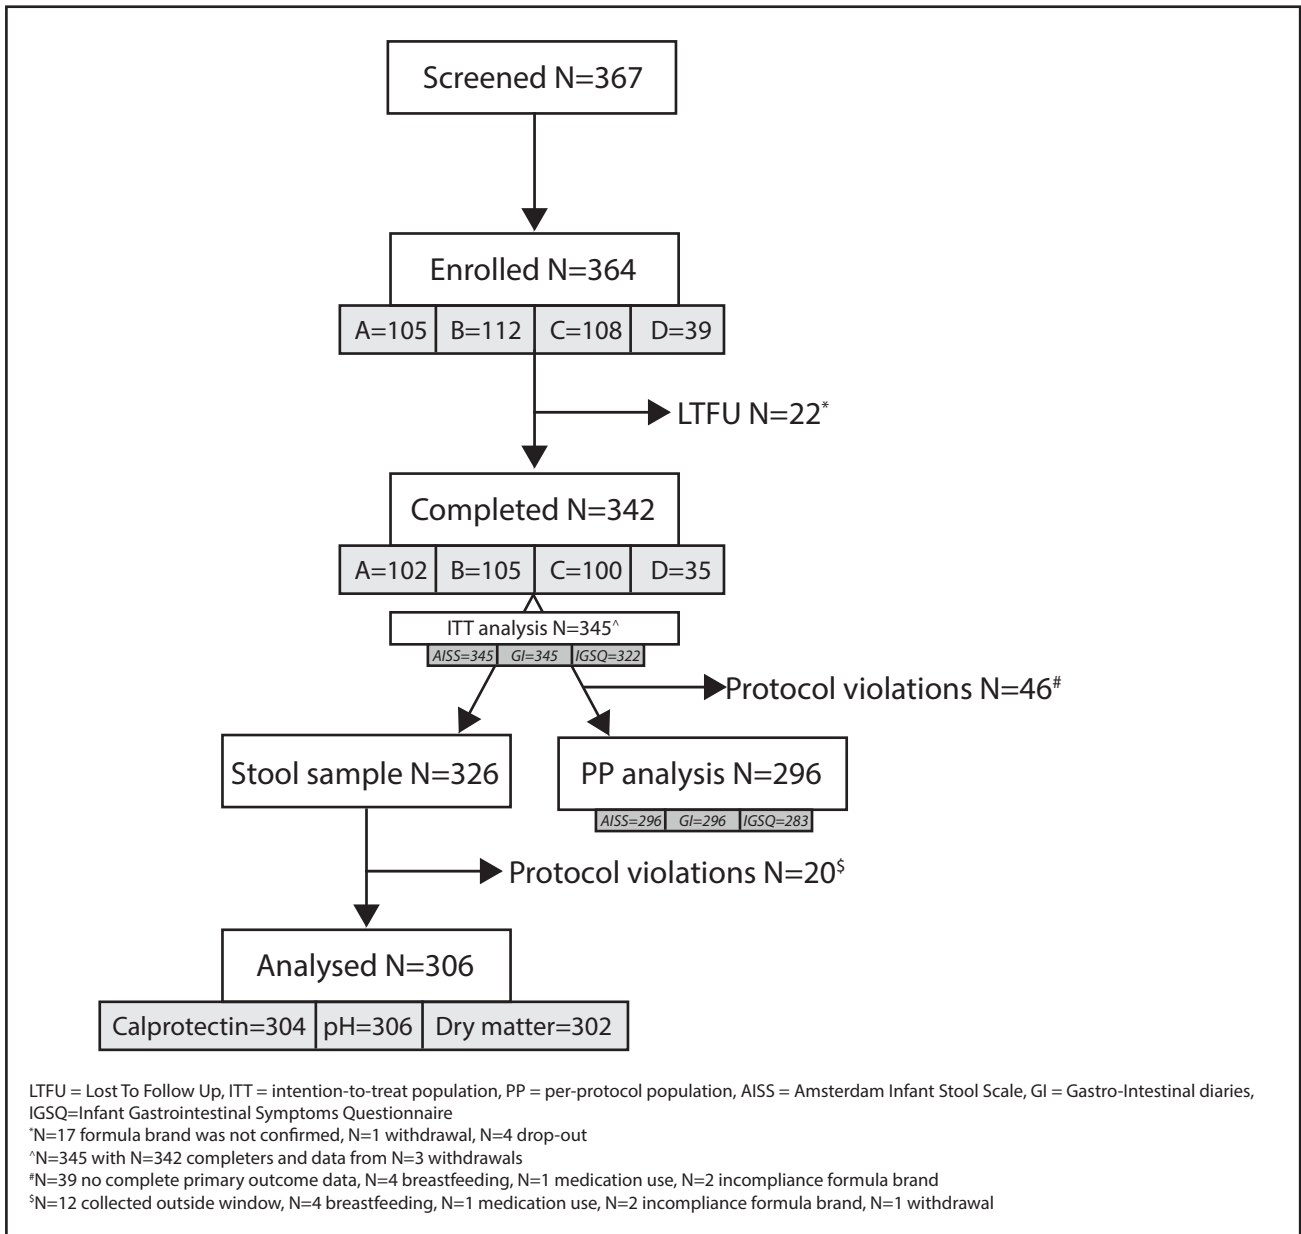

Supplement: MOESM1 [file 26533456]
